# Supplementary material for: Solar Power Ramps in the Future: Assessing Australia's Potential with Climate Projections
Source: Research Square preprint supplement (doi:10.21203/rs.3.rs-2596727/v1), 2023-02-17
Supplement: Supplementary file 1 [file 9c74e067c0e8afb81ae3729e.pdf]

1  
2  
3  
4  
5  
6  
7  
8  
9  
10  
11  
12  
13  
14  
15  
16  
17  
18  
19  
20  
21  
22  
23  
24  
25  
26  
27  
28  
29  
30  
31  
32  
33  
34  
35  
36  
37  
38  
39  
40  
41

Supplementary Information for

**Solar Power Ramps in the Future: Assessing Australia's Potential with  
Climate Projections**

**Shukla Poddar<sup>1,2</sup>, Jason P Evans<sup>2,3</sup>, Merlinde Kay<sup>1</sup>, Abhnil Prasad<sup>1,2,3</sup>, Stephen Bremner<sup>1</sup>**

<sup>1</sup>School of Photovoltaic and Renewable Energy Engineering, University of New South Wales,  
Sydney, Australia

<sup>2</sup>ARC Centre of Excellence for Climate Extremes, University of New South Wales, Sydney,  
Australia

<sup>3</sup>Climate Change Research Centre, Biological, Earth and Environmental Sciences, University  
of New South Wales, Sydney, Australia

Corresponding author: Shukla Poddar (s.poddar@unsw.edu.au)

42 **Contents of this file:**

43 1. Table 1s-6s

44 2. Figures 1s to 22s

45

46 **Introduction**

47 This supporting information includes:

- 48 • Validation of CORDEX-Australasia ensemble mean radiation with two reanalysis products:  
49 MERRA2 and ERA5 (**Figure 1s**).
- 50 • Details of PV technologies and modelling steps for simulating power with PVLIB (**Figure 2s,**  
51 **Table 1s**).
- 52 • Evaluation of PVLIB model selection parameters (**Figure 3s, Table 2s-4s**).
- 53 • Validation of PVLIB power simulations with observations from DKASC solar farm (**Figure**  
54 **4s, Table 5s**).
- 55 • CORDEX-Australasia RCM-GCM pairs used in the study (**Table 6s**).
- 56 • Mean power projections for from mono-crystalline silicon cells and future changes for various  
57 ensemble members under RCP4.5 and RCP8.5 scenario (**Figure 5s-7s**).
- 58 • Ramp characteristics for the near future period (**Figure 8s-10s**).
- 59 • Future changes in mean solar ramp magnitude across Australia for the near future and far future  
60 periods under RCP8.5 and RCP 4.5 scenario for the various ensemble members of CORDEX-  
61 Australasia (**Figure 11s-12s**).
- 62 • Future changes in extreme solar ramp magnitude across Australia for the near future and far  
63 future periods under RCP8.5 and RCP 4.5 scenario for the various ensemble members of  
64 CORDEX-Australasia (**Figure 13s-14s**).
- 65 • Future changes in mean solar ramp frequency across Australia for the near future and far future  
66 periods under RCP8.5 and RCP 4.5 scenario for the various ensemble members of CORDEX-  
67 Australasia (**Figure 15s-16s**).
- 68 • Future changes in extreme solar ramp frequency across Australia for the near future and far  
69 future periods under RCP8.5 and RCP 4.5 scenario for the various ensemble members of  
70 CORDEX-Australasia (**Figure 17s-18s**).
- 71 • Future changes in mean solar ramping periods across Australia for the near future and far future  
72 periods under RCP8.5 and RCP 4.5 scenario for the various ensemble members of CORDEX-  
73 Australasia (**Figure 19s-20s**).
- 74 • Future changes in extreme solar ramp duration across Australia for the near future and far future  
75 periods under RCP8.5 and RCP 4.5 scenario for the various ensemble members of CORDEX-  
76 Australasia (**Figure 21s-22s**).

77  
78  
79  
80  
81  
82

## 1. Validation of solar radiation from CORDEX-Australasia with reanalysis

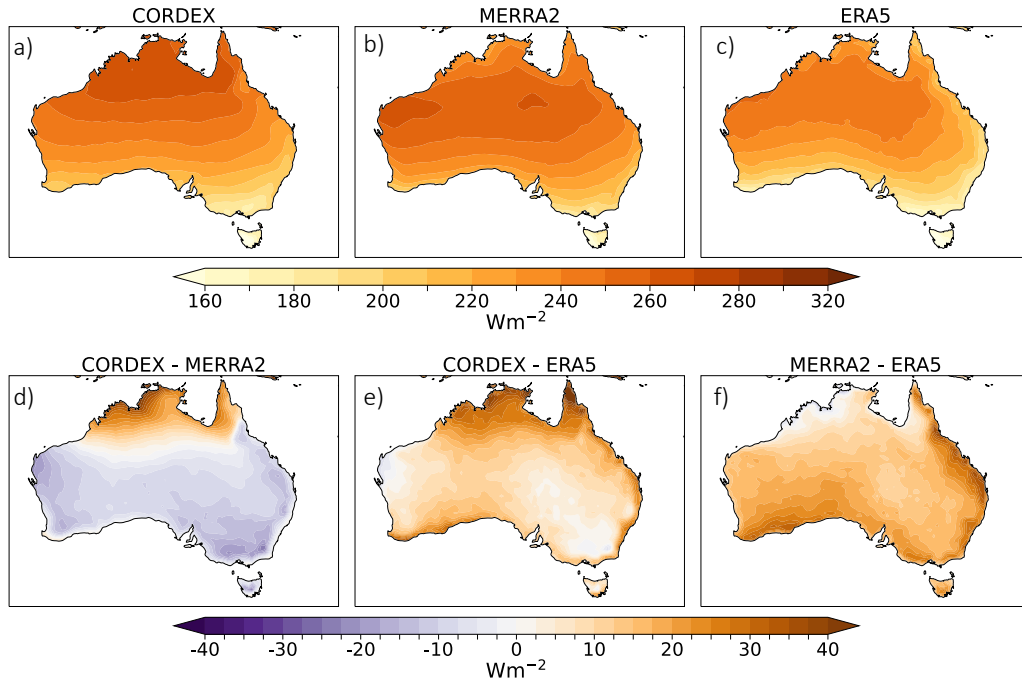

83  
84

85 **Figure 1s.** Validation of mean solar radiation of CORDEX-Australasia with two reanalysis products:  
86 MERRA2 and ERA5. Panel a-c represents the mean solar radiation from 1980-2005 for a) CORDEX-  
87 Australasia ensemble mean, b) MERRA2 c) ERA5. Panel d and e represent the mean bias error  
88 ensemble mean of the CORDEX-Australasia simulations when compared with MERRA2 and ERA5,  
89 respectively, for the historical period (1980-2005). Panel f) represents the difference in mean  
90 downward shortwave radiation in MERRA2 and ERA5 for the historical period (1980-2005).

91

92 In this study, the ensemble mean of shortwave downwelling radiation has been evaluated using  
93 two reanalysis products: Modern-Era Retrospective analysis for Research and Applications  
94 Version 2 (MERRA2) and European Centre for Medium Range Weather Forecasts (ECMWF)  
95 Re-analysis (ERA5), the historical period (1980-2005). We observe a positive bias near  
96 Northern Australia in comparison with MERRA2 while negative biases rest of Australia. While  
97 there is a similar positive bias in the Northern Australian region in comparison with ERA5 data  
98 with negligible positive bias all over the continent. Overall, the CORDEX data captures the  
99 solar radiation with reasonable fidelity over Australia, often falling between the two reanalysis.  
100 These small differences in the CORDEX-Australasia radiation with the reanalysis products are  
101 within an acceptable range. They can be mainly attributed to the sub-grid scale processes

102 occurring in the actual environment and the specific parameterization schemes selected to  
 103 obtain the model simulations. This concise evaluation of the surface reaching downwards  
 104 shortwave radiation in the CORDEX-Australasia ensemble and the previous evaluation studies  
 105 on CORDEX-Australasia ensembles adds confidence to the results presented in the paper.

106  
107

## 108 2. Details of PV technologies and modelling steps for simulating power with PVLIB

109  
110

Table 1s. Details of the PV technology used for simulating and validating PV power using PVLIB

|                           | Mono-Si        | Multi-Si           | CdTe                |
|---------------------------|----------------|--------------------|---------------------|
| <b>Panel Type</b>         | BP-Solar 4170N | Kyocera KD135GX-LP | First Solar FS 272  |
| <b>Inverter Type</b>      | SMA SMC 6000A  | SMA SMC 5000A      | Fronius Primo 6.0-1 |
| <b>Array Structure</b>    | Fixed          | Fixed              | Fixed               |
| <b>Array Tilt/Azimuth</b> | 20/0           | 20/0               | 20/0                |
| <b>Simulation Period</b>  | 2010-2016      | 2010-2013          | 2010-2016           |

111  
112  
113

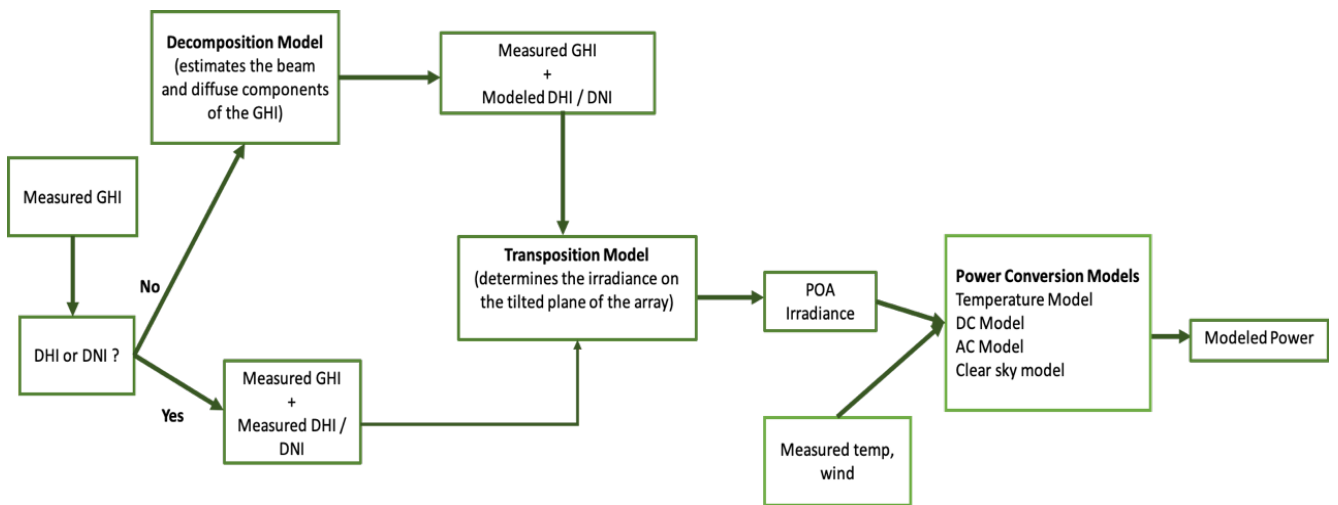

114  
115  
116

Figure 2s. Flowchart showing the various modelling steps in PVLIB.

117  
118  
119  
120  
121  
122  
123  
124  
125  
126  
127

128  
 129  
 130  
 131  
 132  
 133  
 134

### 3. Model Selection for PVLIB power simulations

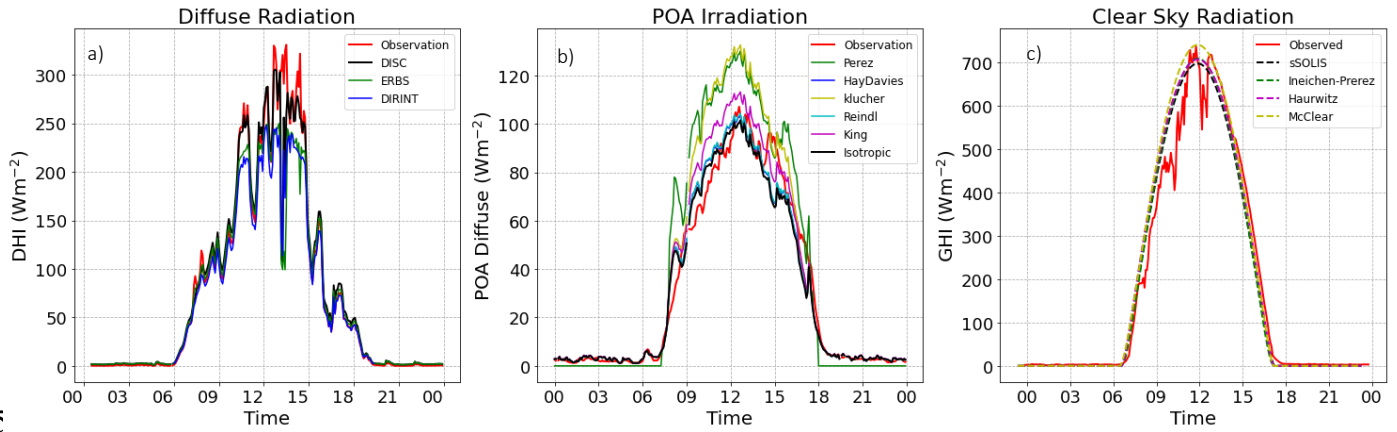

135  
 136  
 137  
 138  
 139  
 140  
 141  
 142  
 143  
 144

**Figure 3s.** Sample DHI, POA diffuse and clear sky radiation at every 5-minute interval from observations and modelled output obtained using PVLIB. Panel a), b) and c) represents the diurnal curves for DHI, POA diffuse irradiation and clear sky irradiation. The red line represents the observations recorded during the day.

**Table 2s.** Error metrics comparing diffuse horizontal irradiance (DHI) obtained from decomposition models with the DHI observations recorded at the weather station at DKASC solar farm

| Decomposition Models | MBE (W/m <sup>2</sup> ) | RMSE (W/m <sup>2</sup> ) |
|----------------------|-------------------------|--------------------------|
| Disc                 | 10.550885               | 44.411851                |
| ERBS                 | 12.241542               | 45.937148                |
| DIRINT               | 13.694237               | 52.020097                |

145  
 146  
 147  
 148

**Table 3s.** Error metrics comparing plane of array (POA) DHI obtained from transposition models with the POA-DHI observations from the weather station at DKASC solar farm.

| Transposition Models | MBE (W/m <sup>2</sup> ) | RMSE (W/m <sup>2</sup> ) |
|----------------------|-------------------------|--------------------------|
| Isotropic            | 6.01                    | 43.20                    |
| Hay Davies           | 6.32                    | 44.27                    |
| Perez                | 11.64                   | 47.96                    |
| klucher              | 12.31                   | 46.32                    |

|        |       |       |
|--------|-------|-------|
| Reindl | 6.53  | 44.35 |
| King   | 9.517 | 45.40 |

149  
150  
151  
152  
153  
154  
155

**Table 4s.** Error metrics comparing clear-sky global horizontal irradiation (GHI) obtained from clear-sky models with the clear-sky GHI from reanalysis product- MERRA2. The modelled GHI is compared with the station observations at DKASC solar farm by extracting GHI during the clear sky periods. The clear-sky periods are calculated following Reno [1].

| Model         | MERRA2                   |                               | Observations             |                               |
|---------------|--------------------------|-------------------------------|--------------------------|-------------------------------|
|               | RMSE (W/m <sup>2</sup> ) | Mean Bias (W/m <sup>2</sup> ) | RMSE (W/m <sup>2</sup> ) | Mean Bias (W/m <sup>2</sup> ) |
| sSOLIS        | 23.056                   | 0.914                         | 19.825                   | -5.229                        |
| Inchein-Perez | 26.112                   | -3.916                        | 21.598                   | -6.172                        |
| Haurwitz      | 31.354                   | -5.090                        | 28.329                   | -8.365                        |
| McClear       | 31.15                    | 8.839                         | 22.396                   | -1.308                        |

156  
157  
158  
159  
160  
161  
162  
163  
164  
165  
166  
167  
168  
169  
170  
171  
172  
173  
174  
175  
176  
177  
178  
179

180  
181  
182

#### 4. Validation of PVLIB power simulations with observations from DKASC solar farm

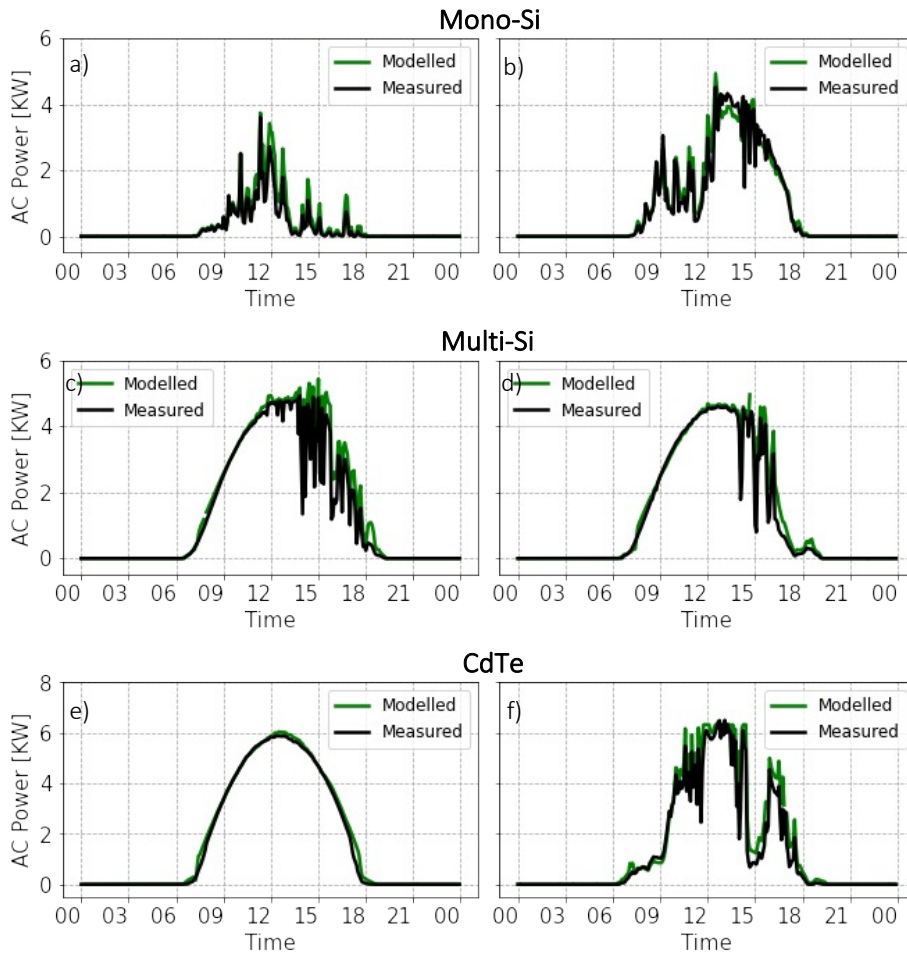

183  
184  
185  
186  
187  
188  
189

**Figure 4s.** Sample PV power output at every 5-minute interval for different PV technologies obtained using PVLIB. Panel a) and b) represent the diurnal power curves for mono-crystalline Silicon cells. Panel c) and d) represent the diurnal power curves for multi-crystalline Silicon cells. Panel e) and f) represent the diurnal curve for thin film Cadmium Telluride cells. The black line represents the AC power output values recorded during the day. The green line represents the modelled AC power using PVLIB.

190  
191  
192

**Table 5s.** Error metrics comparing power projections obtained from PVLIB simulations and observations recorded at the DKASC solar farm recorded at every 5-minute.

| PV Technology | Mean Bias (KW) | RMSE (KW) |
|---------------|----------------|-----------|
| Mo-Si         | 0.02           | 0.31      |
| Mu-Si         | 0.06           | 0.39      |
| CdTe          | 0.10           | 0.54      |

193

194  
195  
196  
197  
198

## 5. CORDEX-Australasia RCM-GCM pairs used in the study

**Table 6s.** CORDEX-Australasia GCM-RCM pairs analyzed in this study provided climate projections for both the historical and future periods under RCP8.5 and RCP4.5 scenarios.

| RCM<br>GCM | WRF J | WRF K |
|------------|-------|-------|
| ACCESS1.0  |       |       |
| ACCESS1.3  |       |       |
| CanESM2    |       |       |

199  
200

## 6. Mean power projections for Mo-Si cells and future changes for each ensemble member under RCP4.5 and RCP8.5 scenario

201  
202  
203  
204

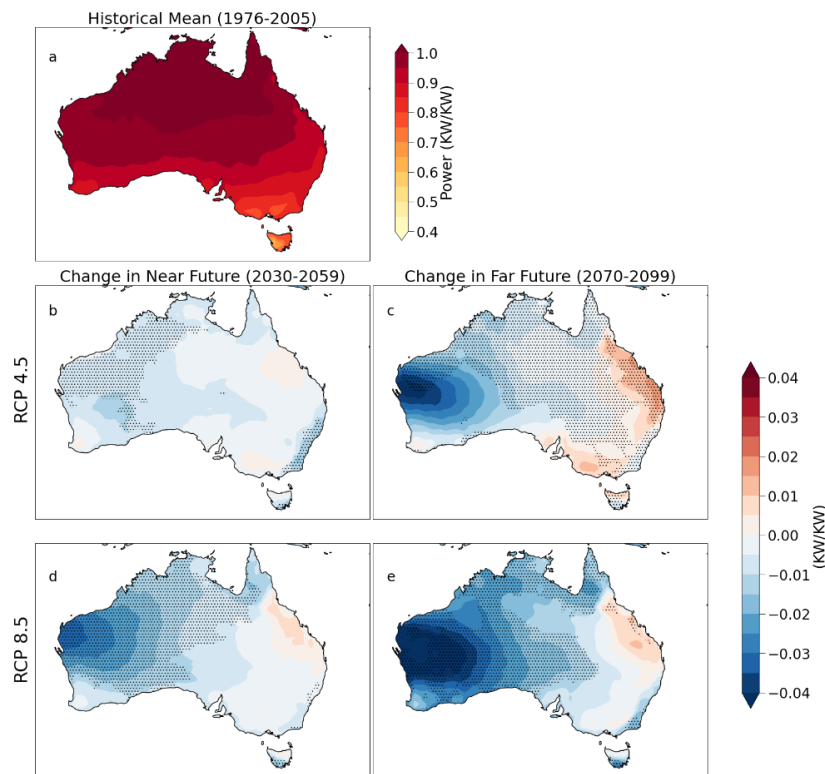

205  
206  
207  
208  
209  
210  
211

**Figure 5s.** Normalized PV Power across Australia. Panel a) represents the mean normalized power for the historical period (1976-2005). Panel b) and d) represent the future changes in the mean power for the near future (2030-2059) period under RCP4.5 and RCP8.5. Panel c) and e) represents the future changes in the mean power for the far future (2070-2099) period under RCP4.5 and RCP8.5. Stippling indicates a significant change (according to methods: significant test).

212  
213  
214  
215  
216  
217  
218  
219  
220  
221  
222  
223  
224  
225

The mean normalized power generation capacity for the monocrystalline Silicon module during the historical period is shown in figure 4s a, and future changes under RCP4.5 and RCP8.5 scenarios are shown in figures 4s b - d for future periods. Due to high solar exposure at those locations, the historical power generation capacity is highest for Northern and Central Australia. During the near future, there is expected to be a slight decline in the power projection throughout the continent, with minor increases in eastern Queensland under both scenarios. There is a significantly higher decrease in the west under RCP8.5 during the near future, unlike RCP4.5. This decline intensifies in magnitude during the far future period for both scenarios. However, it is projected that the East and Southern coastal parts will undergo a small but significant increase in power generation capacity during the far future under RCP4.5, unlike under RCP8.5, where increases are restricted only to Eastern Queensland.

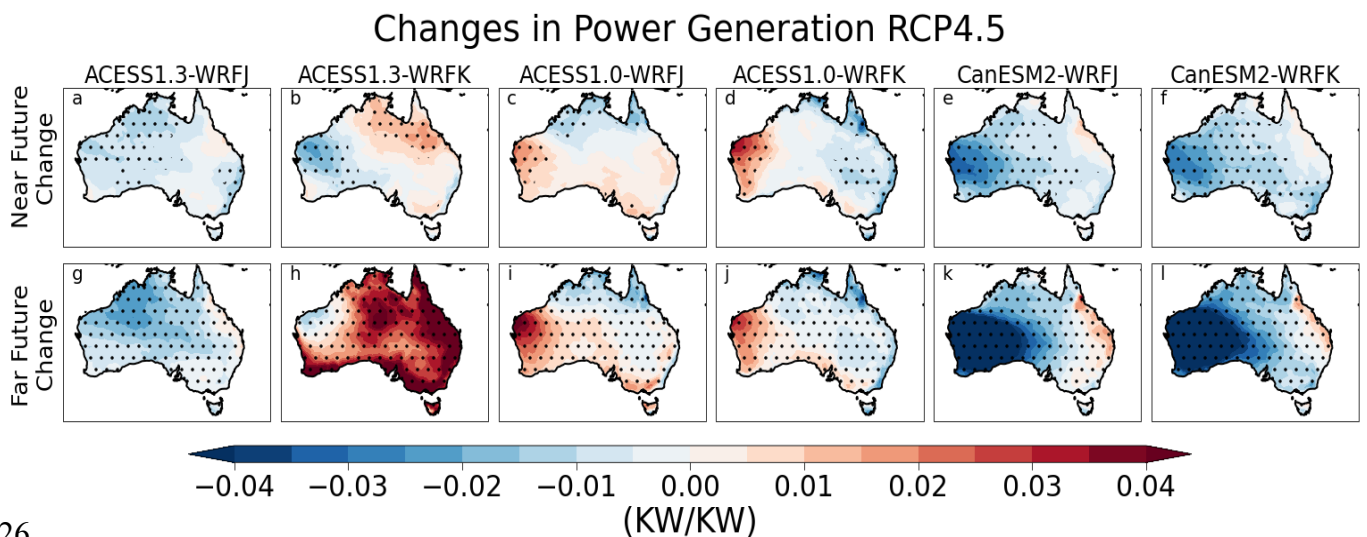

226  
227  
228  
229  
230  
231  
232  
233

**Figure 6s.** Future changes in solar power generation from mono-crystalline silicon cells. Panel a-f represents the future changes in solar power for ensemble members of CORDEX-Australasia for the near future (2030-2059) period under the RCP4.5 scenario. Panel g-l represents the future changes in solar power for ensemble members of CORDEX-Australasia for the far future (2070-2099) period under the RCP4.5 scenario.

## Changes in Power Generation RCP8.5

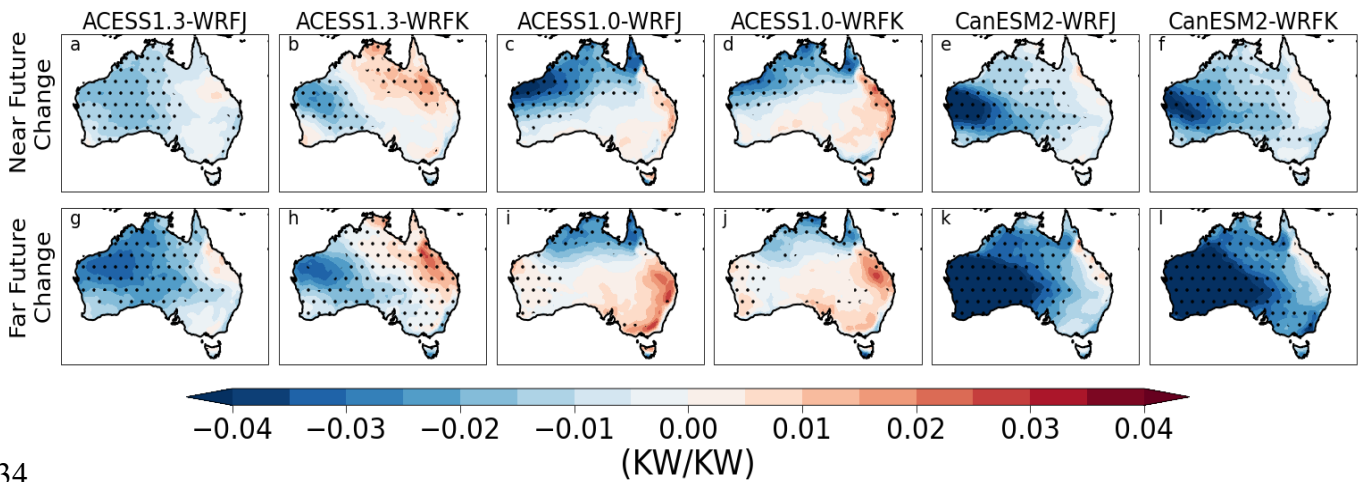

234  
235

236 **Figure 7s.** Future changes in solar power generation from mono-crystalline silicon cells. Panel a-f  
 237 represents the future changes in solar power for ensemble members of CORDEX-Australasia for the  
 238 near future (2030-2059) period under the RCP8.5 scenario. Panel g-l represents the future changes in  
 239 solar power for ensemble members of CORDEX-Australasia for the far future (2070-2099) period  
 240 under the RCP8.5 scenario.

241  
242  
243  
244  
245  
246  
247  
248  
249  
250  
251  
252  
253  
254  
255  
256  
257  
258

259  
260  
261  
262  
263  
264

7. Near Future changes for the ramp characteristics across Australia under RCP4.5 and RCP8.5 scenario

Ramp Magnitude:

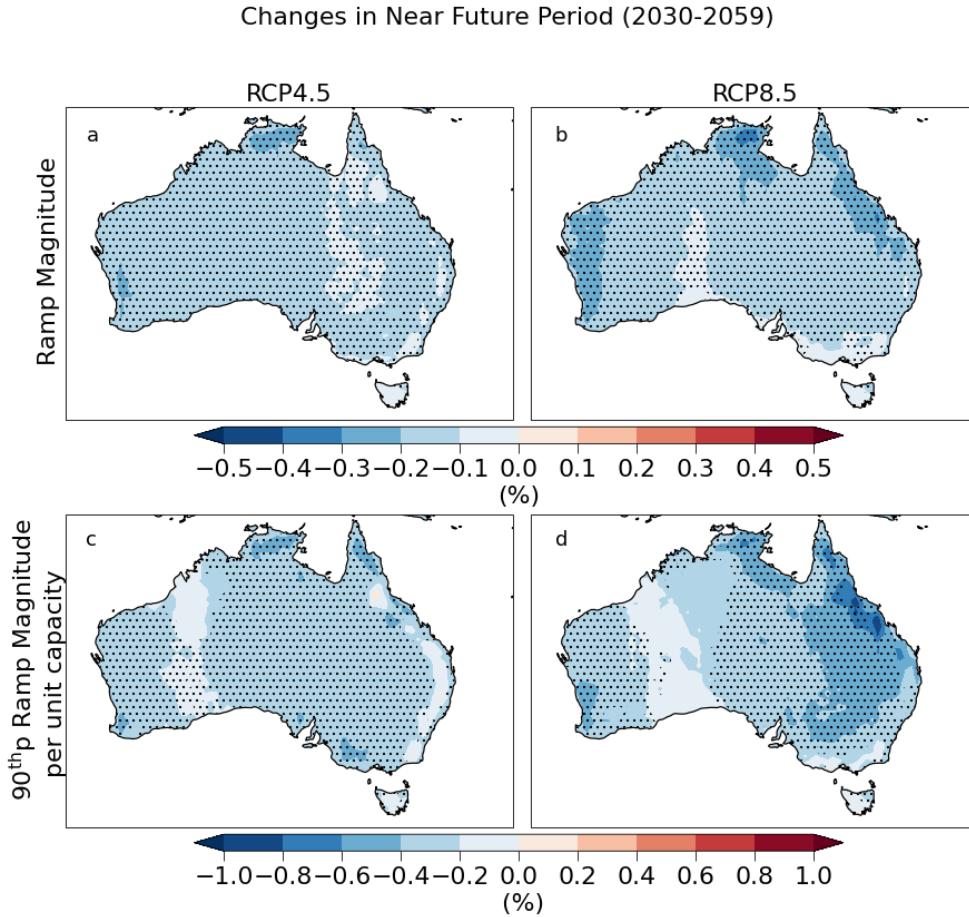

265  
266  
267  
268  
269  
270  
271  
272  
273  
274  
275  
276  
277  
278  
279

**Figure 8s.** Ramp magnitude change across Australia for the near future period (2030-2059). Panel a) and b) represent the future changes in mean ramp magnitude for the far future (2030-2059) period under RCP4.5 and RCP8.5. Panel c) and d) represent the future changes in ramp magnitude at the 90<sup>th</sup> percentile for the far future (2030-2059) period under RCP4.5 and RCP8.5. Stippling indicates a significant change (according to methods: significant test).

280

281 **Ramp Frequency:**

Changes in Near Future Period (2030-2059)

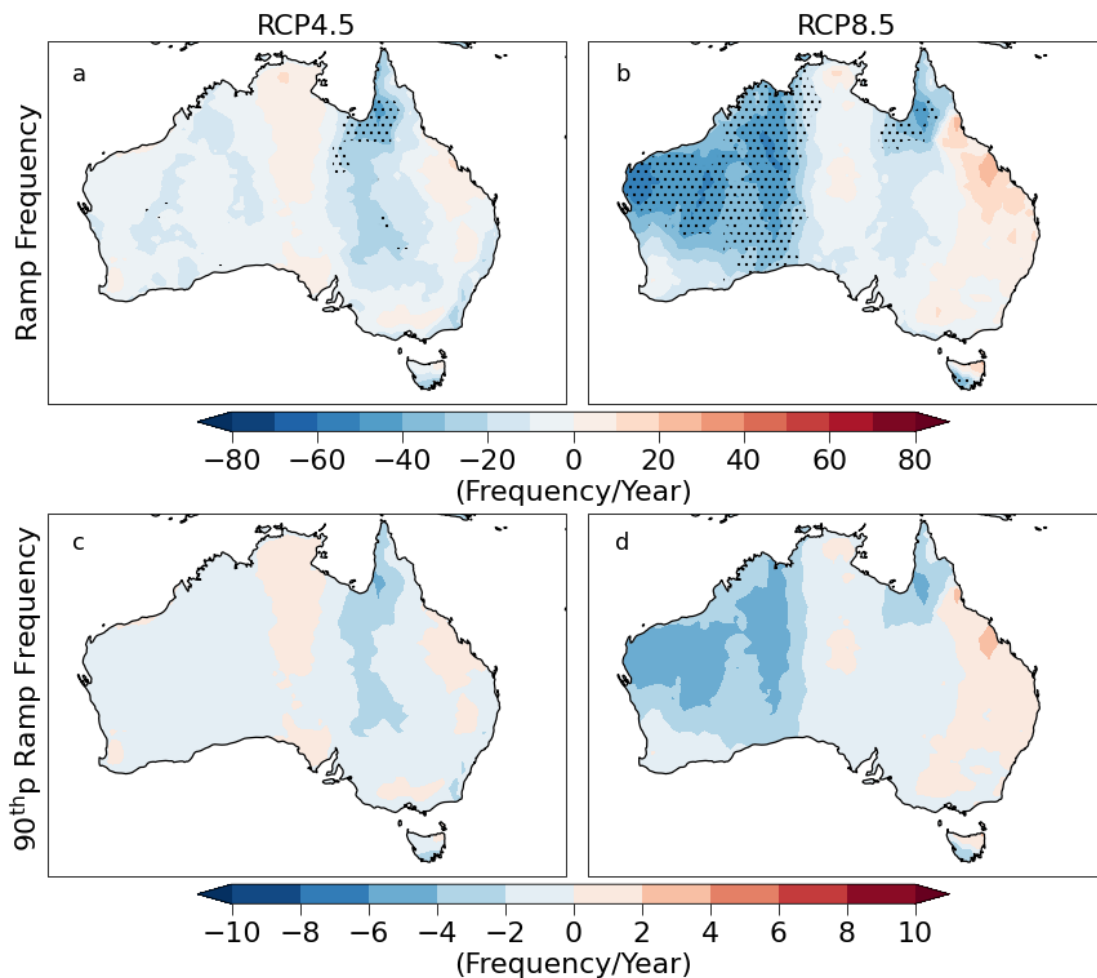

282

283 **Figure 9s.** Ramp frequency change across Australia for the near future period (2030-2099). Panel a)

284 and b) represent the future changes in mean ramp frequency per year for the near future (2030-2059)

285 period under RCP4.5 and RCP8.5. Panel c) and d) represent the future changes in the frequency of

286 ramps with ramp magnitude at the 90<sup>th</sup> percentile for the near future (2030-2059) period under

287 RCP4.5 and RCP8.5. Stippling indicates a significant change (according to methods: significant test).

288

289

290

291

292

293

294

295 Ramp Periods:

296

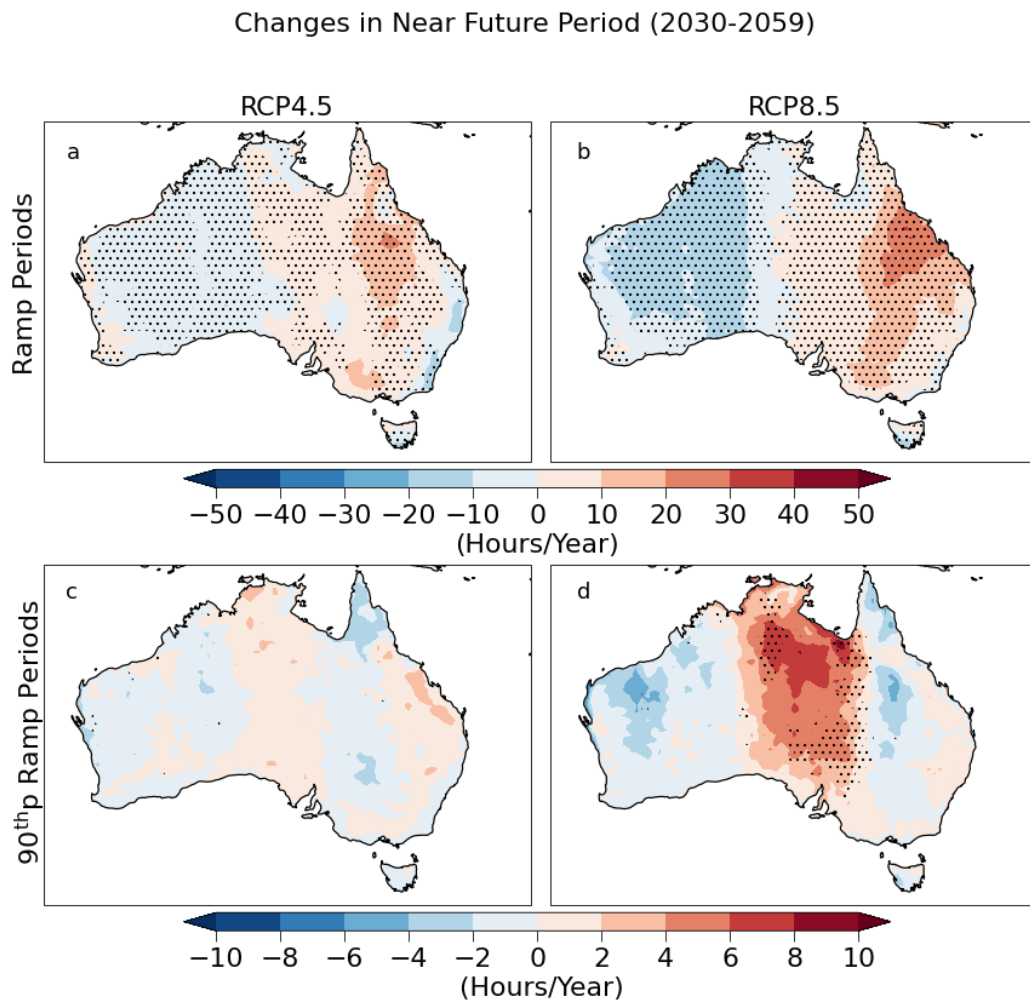

297

298

299

300

301

302

303

304

305

306

307

308

309

310

311

312

**Figure 10s.** Ramp period changes across Australia for the near future period (2030-2059). Panel a) and b) represent the future changes in mean ramp periods per year for the near future (2030-2059) period under RCP4.5 and RCP8.5. Panel c) and d) represent the future changes in ramp periods with ramp magnitude at the 90<sup>th</sup> percentile for the near future (2030-2059) period under RCP4.5 and RCP8.5. Stippling indicates a significant change (according to methods: significant test).

313  
314  
315

### 8. Future Changes in the mean ramp magnitude for each ensemble member under RCP4.5 and RCP8.5 scenario

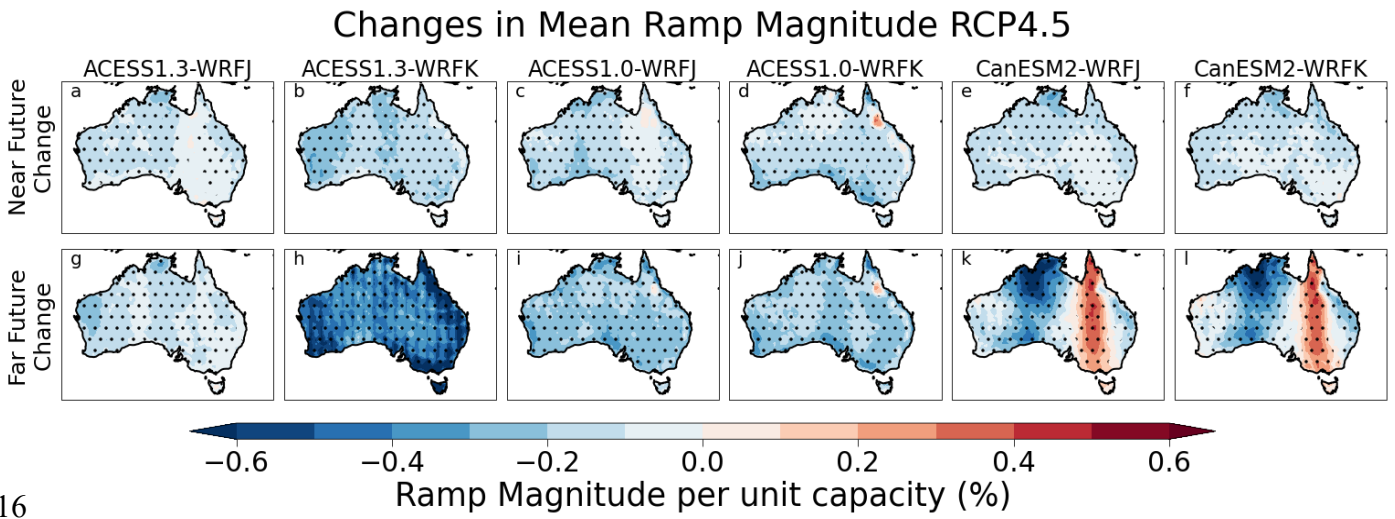

316  
317

318 *Figure 11s.* Future changes in mean solar power ramp magnitude. Panel a-f represents the future  
319 changes in mean ramp magnitude for ensemble members of CORDEX-Australasia for the near future  
320 (2030-2059) period under the RCP4.5 scenario. Panel g-l represents the future changes in mean  
321 ramp magnitude for ensemble members of CORDEX-Australasia for the far future (2070-2099)  
322 period under the RCP4.5 scenario.

323

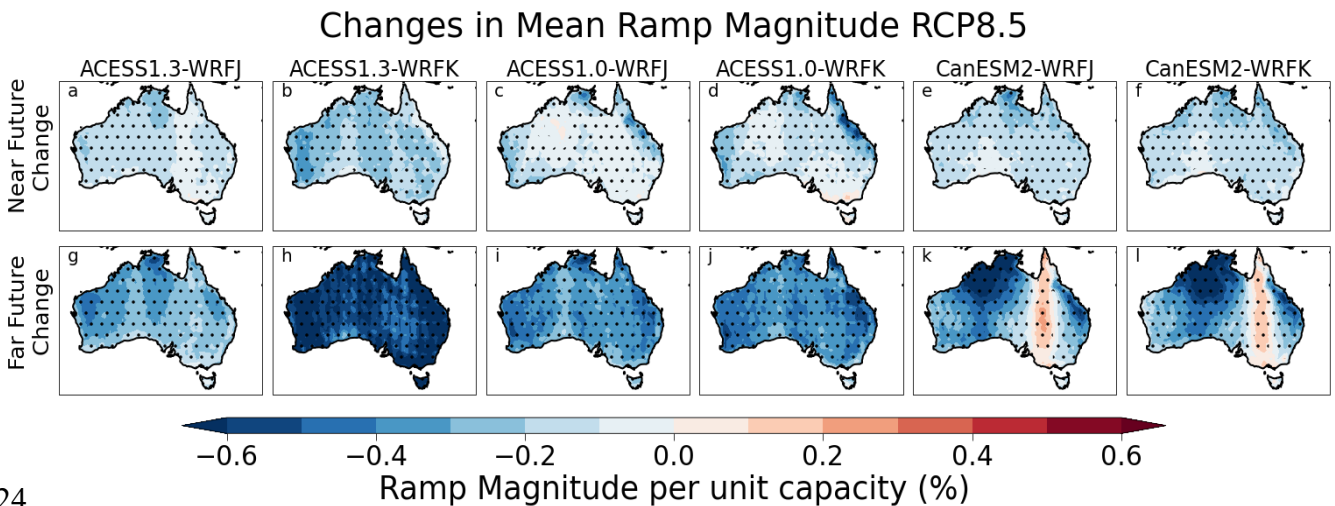

324  
325

326 *Figure 12s.* Future changes in mean solar power ramp magnitude. Panel a-f represents the future  
327 changes in mean ramp magnitude for ensemble members of CORDEX-Australasia for the near future  
328 (2030-2059) period under the RCP4.5 scenario. Panel g-l represents the future changes in mean  
329 ramp magnitude for ensemble members of CORDEX-Australasia for the far future (2070-2099)  
330 period under the RCP4.5 scenario.

331

332 **9. Future Changes in the ramp magnitude at 90<sup>th</sup> percentile for each ensemble member**  
 333 **under RCP4.5 and RCP8.5 scenario**

Changes in 90th Percentile Ramp Magnitude RCP4.5

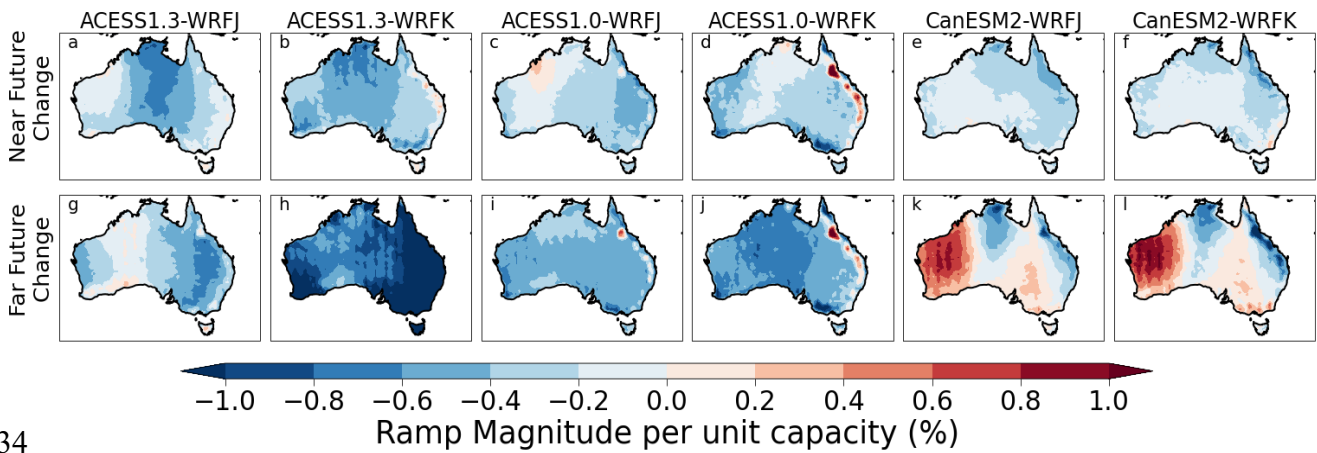

334  
335

336 *Figure 13s. Future solar power ramp magnitude changes at the 90<sup>th</sup> percentile, representing extreme*  
 337 *ramps. Panel a-f represents the future changes in extreme ramp magnitude for ensemble members of*  
 338 *CORDEX-Australasia for the near future (2030-2059) period under the RCP4.5 scenario. Panel g-l*  
 339 *represents the future changes in extreme ramp magnitude for ensemble members of CORDEX-*  
 340 *Australasia for the far future (2070-2099) period under the RCP4.5 scenario.*

341

Changes in 90th Percentile Ramp Magnitude RCP8.5

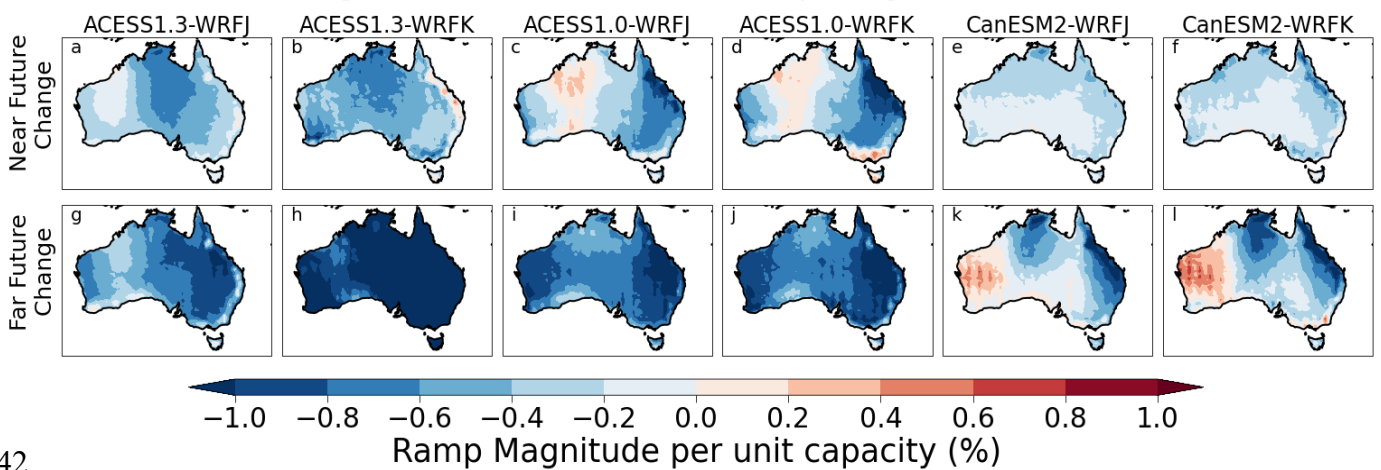

342  
343

344 *Figure 14s. Future solar power ramp magnitude changes at the 90<sup>th</sup> percentile, representing extreme*  
 345 *ramps. Panel a-f represents the future changes in extreme ramp magnitude for ensemble members of*  
 346 *CORDEX-Australasia for the near future (2030-2059) period under the RCP8.5 scenario. Panel g-l*  
 347 *represents the future changes in extreme ramp magnitude for ensemble members of CORDEX-*  
 348 *Australasia for the far future (2070-2099) period under the RCP8.5 scenario.*

349

350 **10. Future Changes in the mean ramp frequency for each ensemble member under**  
 351 **RCP4.5 and RCP8.5 scenario**  
 352  
 353

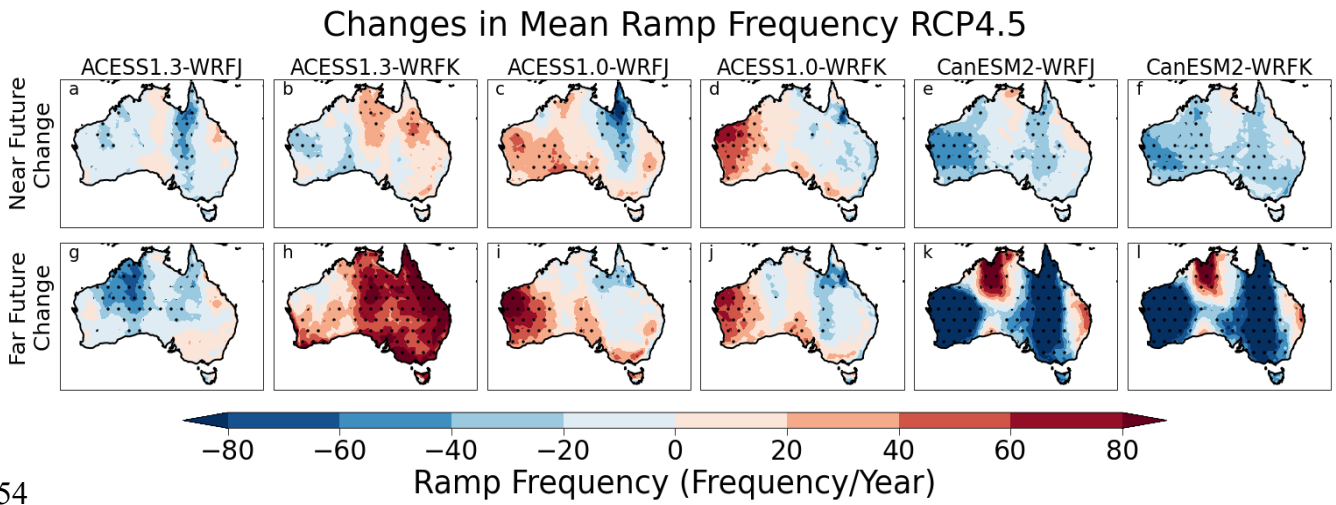

354  
 355  
 356 *Figure 15s. Future changes in mean solar power ramp frequency. Panel a-f represents the future*  
 357 *changes in extreme ramp frequency for ensemble members of CORDEX-Australasia for the near*  
 358 *future (2030-2059) period under the RCP4.5 scenario. Panel g-l represents the future changes in*  
 359 *extreme ramp frequency for ensemble members of CORDEX-Australasia for the far future (2070-*  
 360 *2099) period under the RCP4.5 scenario.*

361

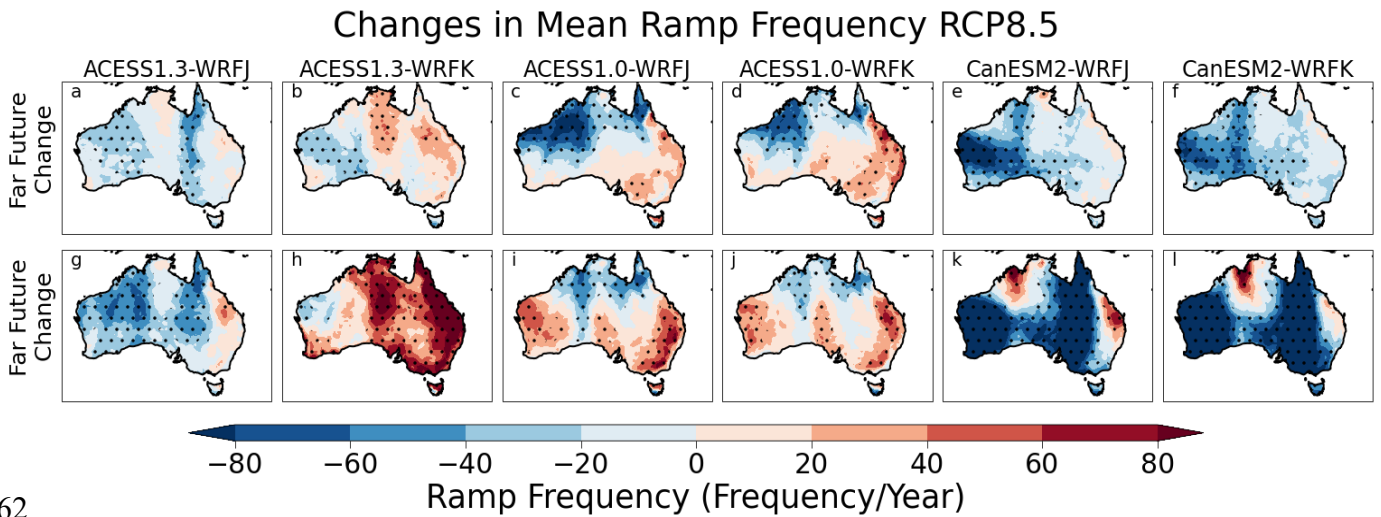

362  
 363  
 364 *Figure 16s. Future changes in mean solar power ramp frequency. Panel a-f represents the future*  
 365 *changes in extreme ramp frequency for ensemble members of CORDEX-Australasia for the near*  
 366 *future (2030-2059) period under the RCP8.5 scenario. Panel g-l represents the future changes in*  
 367 *extreme ramp frequency for ensemble members of CORDEX-Australasia for the far future (2070-*  
 368 *2099) period under the RCP8.5 scenario.*

369 **11. Future Changes in the frequency of ramp magnitude at the 90<sup>th</sup> percentile for each**  
 370 **ensemble member under the RCP4.5 and RCP8.5 scenario**  
 371

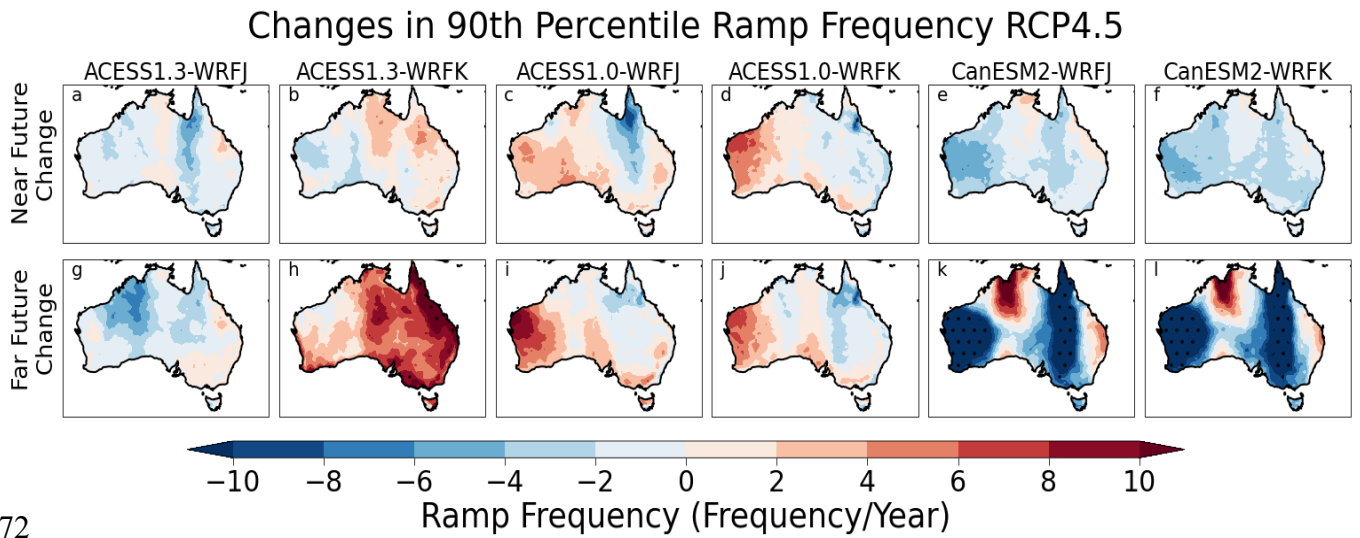

372  
 373  
 374 **Figure 17s.** Future changes in the frequency of ramps with ramp magnitude at the 90<sup>th</sup> percentile.  
 375 Panel a-f represents the future changes in extreme ramp frequency for ensemble members of  
 376 CORDEX-Australasia for the near future (2030-2059) period under the RCP4.5 scenario. Panel g-l  
 377 represents the future changes in extreme ramp frequency for ensemble members of CORDEX-  
 378 Australasia for the far future (2070-2099) period under the RCP4.5 scenario.  
 379

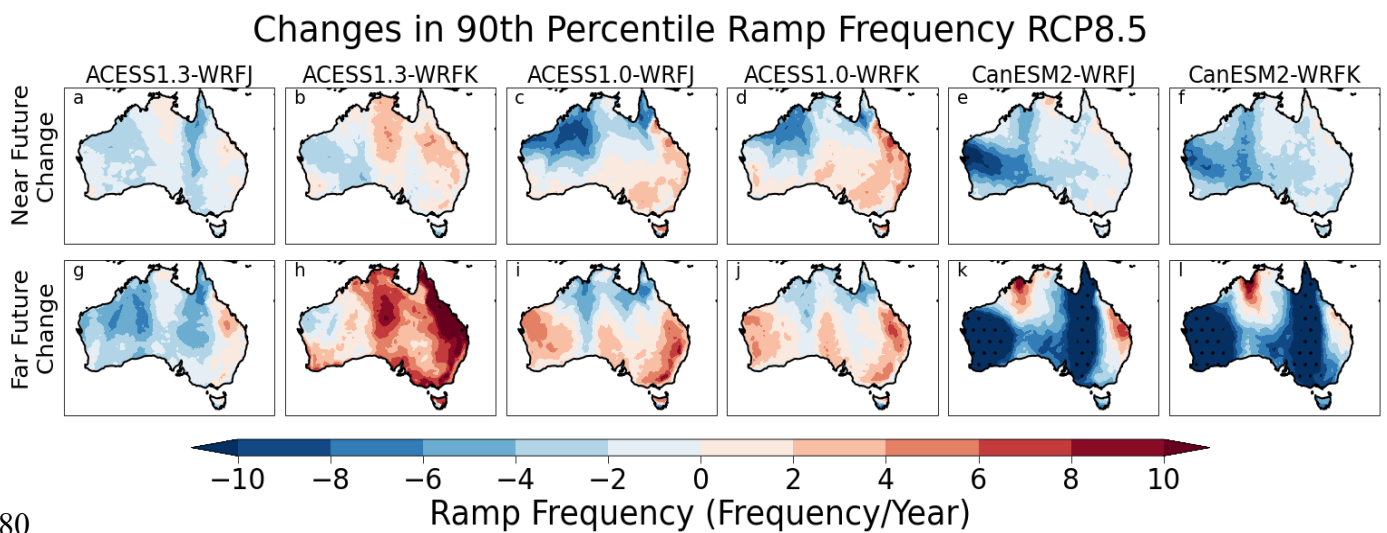

380  
 381  
 382 **Figure 18s.** Future changes in the frequency of ramps with ramp magnitude at the 90<sup>th</sup> percentile.  
 383 Panel a-f represents the future changes in extreme ramp frequency for ensemble members of  
 384 CORDEX-Australasia for the near future (2030-2059) period under the RCP8.5 scenario. Panel g-l  
 385 represents the future changes in extreme ramp frequency for ensemble members of CORDEX-  
 386 Australasia for the far future (2070-2099) period under the RCP8.5 scenario.

387 **12. Future Changes in the mean ramping periods for each ensemble member under**  
 388 **RCP4.5 and RCP8.5 scenario**

389  
 390

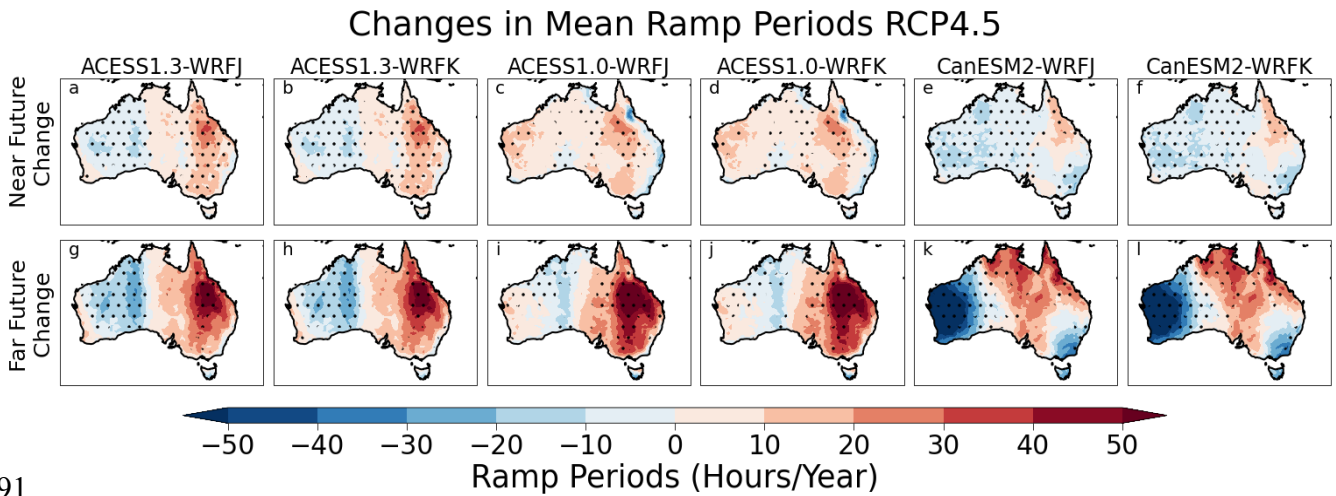

391  
 392  
 393  
 394  
 395  
 396  
 397  
 398

*Figure 19s. Future changes in mean solar power ramping period. Panel a-f represents the future changes in mean ramp periods for ensemble members of CORDEX-Australasia for the near future (2030-2059) period under the RCP4.5 scenario. Panel g-l represents the future changes in the mean ramp period for ensemble members of CORDEX-Australasia for the far future (2070-2099) period under the RCP4.5 scenario.*

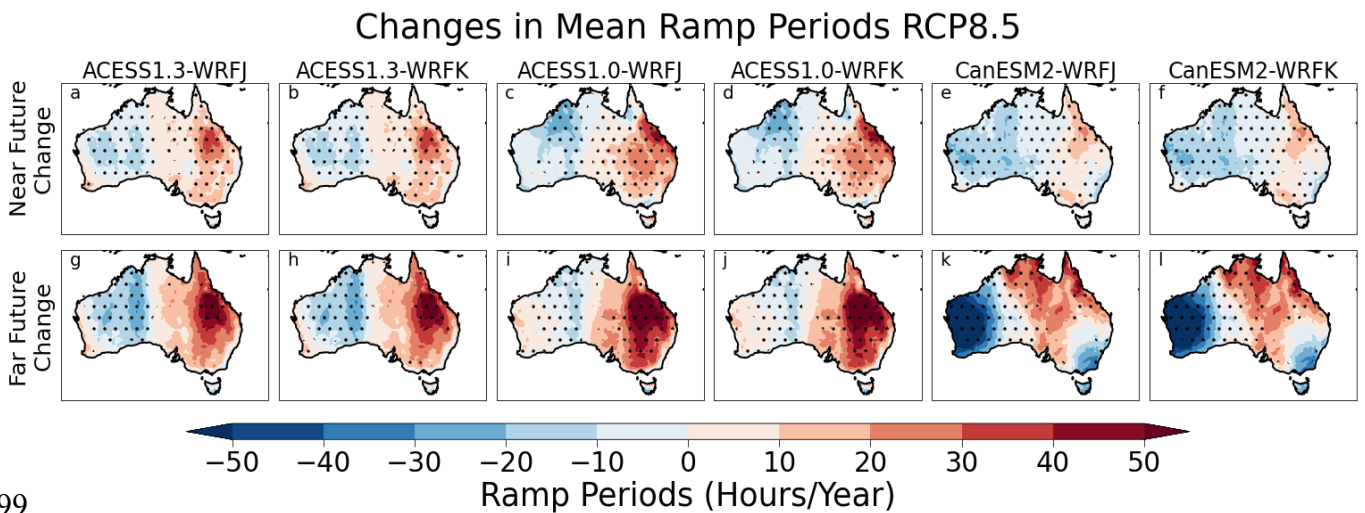

399  
 400  
 401  
 402  
 403  
 404  
 405

*Figure 20s. Future changes in mean solar power ramping period. Panel a-f represents the future changes in mean ramp periods for ensemble members of CORDEX-Australasia for the near future (2030-2059) period under the RCP8.5 scenario. Panel g-l represents the future changes in the mean ramp period for ensemble members of CORDEX-Australasia for the far future (2070-2099) period under the RCP8.5 scenario.*

406 **13. Future Changes in the ramping period of ramp magnitude at the 90<sup>th</sup> percentile for**  
 407 **each ensemble member under the RCP4.5 and RCP8.5 scenario**  
 408  
 409

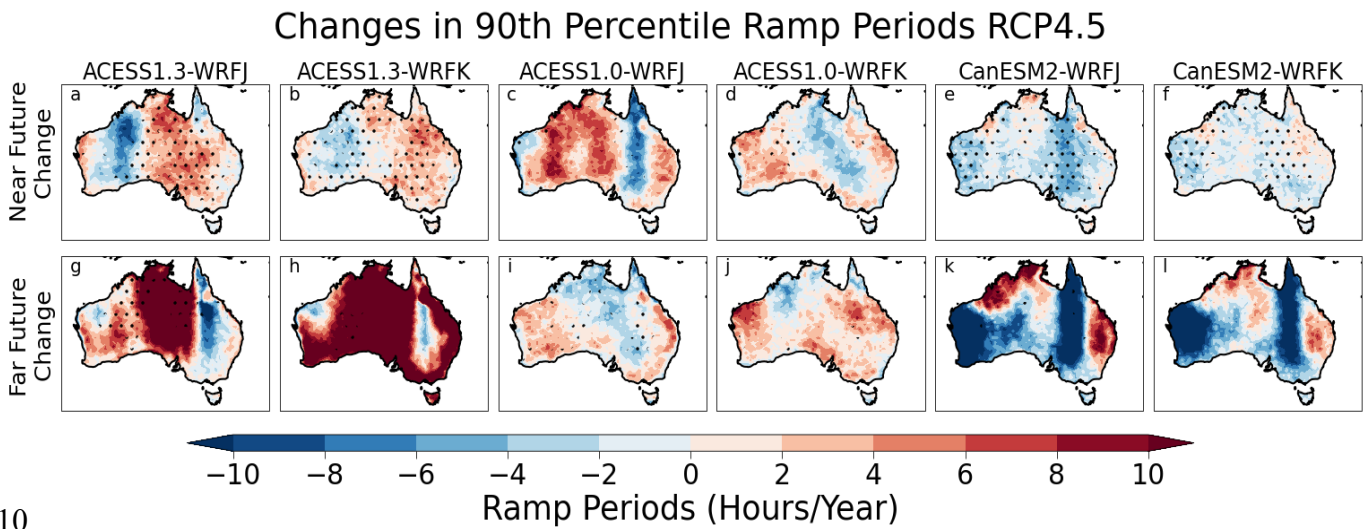

410  
 411  
 412 **Figure 21s.** Future changes represent the ramp periods with ramp magnitude at the 90<sup>th</sup> percentile.  
 413 Panel a-f represents the future changes in the extreme ramp period for ensemble members of  
 414 CORDEX-Australasia for the near future (2030-2059) period under the RCP4.5 scenario. Panel g-l  
 415 represents the future changes in the extreme ramp period for ensemble members of CORDEX-  
 416 Australasia for the far future (2070-2099) period under the RCP4.5 scenario.  
 417  
 418

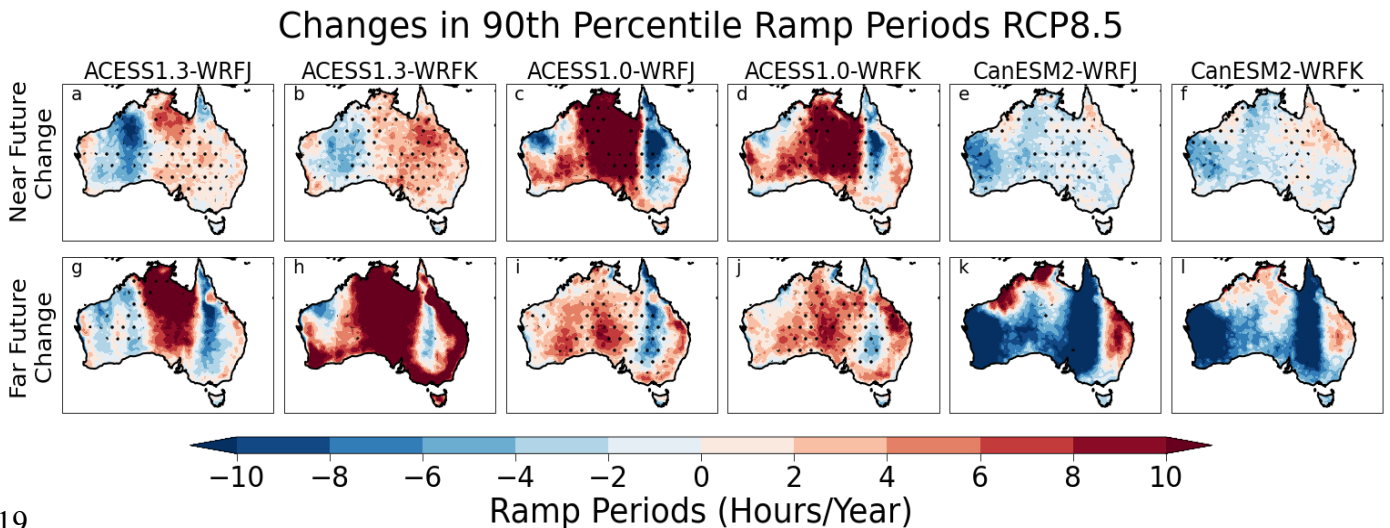

419  
 420 **Figure 22s.** Future changes represent the ramp periods with ramp magnitude at the 90<sup>th</sup> percentile.  
 421 Panel a-f represents the future changes in the extreme ramp period for ensemble members of  
 422 CORDEX-Australasia for the near future (2030-2059) period under the RCP8.5 scenario. Panel g-l  
 423 represents the future changes in the extreme ramp period for ensemble members of CORDEX-  
 424 Australasia for the far future (2070-2099) period under the RCP8.5 scenario.  
 425

426

427 Reference:

428 [1] Reno MJ, Hansen CW. Identification of periods of clear sky irradiance in time series of GHI  
429 measurements. *Renew Energy* 2016;90:520–31. <https://doi.org/10.1016/j.renene.2015.12.031>.

430
